# Supplementary material for: The Application of Gene Expression Profiling in Predictions of Occult Lymph Node Metastasis in Colorectal Cancer Patients
Source: Biomedicines. 2018 Mar 2;6(1):27. doi: 10.3390/biomedicines6010027 (PMC5874684; doi:10.3390/biomedicines6010027)
Supplement: Supplementary file 1 [file biomedicines-06-00027-s001.xlsx]

## Sheet: Sheet2
References	Most significantly up-regulated genes	Most significantly down-regulated genes	Conclusion
Arango et al., (2005) [22]	ARCN1, ARF1, ARF4, CLTA, CLTC, GDI2, RHOA,SDCBP, SEC24D, VCP and VPS16	AARS, EPRS, NARS, TARS	The study show that gene-expression profiling of surgical tumor samples can predict recurrence in Dukes’ C patients and could be used to guide decisions concerning the clinical management of the patients
Bertucci et al., (2004) [23]	CA4, CHGA, CNN1, MYH11, FCGBP, KCNMB1 and SST	CA3, CCT4, EIF3S6, EEF1A1, IFITM1, CSE1L, NME1 or RAN	Results suggested that microarrays may provide means to improve the classification of CRC, provide new potential targets against carcinogenesis and new diagnostic and/or prognostic markers and therapeutic targets
Watanabe et al., (2011) [24]	N/A	N/A	FOXC2 appears to be involved in determining the aggressiveness of lymph node metastasis in colorectal cancer. 18 genes found to decrease in patients with LNM in comparison to those without metastases
Watanabe et al., (2009a) [25]	37 genes showed higher expression (PSMA, ST7 and BAP1)	36 genes showed Lower expression	Study suggests the possibility that gene expression profiling may be useful in predicting the presence of lymph node metastasis and provide insights into the development of novel therapeutic targets
Watanabe et al., (2009b) [26]	21 genes higher in patients with recurrence	24 genes lower expression (CABIN1, GSTT1)	The results show that gene expression profiling is useful in predicting recurrence in stage III colorectal cancer
Wang et al., (2004) [27]	N/A	N/A	A 23-gene signature that predicts recurrence in Dukes’ B patients (YWHAH, RCC1, BTEB2, CAPG, LAT)
Salazar et al., (2010) [28]	N/A	N/A	Coloprint can distinguish Low and high risk patients 18 genes (MCTP1, LAMA3, CTSC, PYROX D1, EDEM1, IL2RB, ZNF697, SLC6A11, IL2RA, CYFIP2, PIM3, LIF, PLIN3, HSD3B1, ZBED4, PPARA, THNSL2, CA4388O2)
Meeh et al., (2009) [29]	FN1 , PITX2	12 genes upregulated	Development of LN in CRC occurs in part through elevated epithelial FN1 expression
Lenehan et al., (2012) [30]	BMI, VEGFA, RPS10, ETV6 and H3F3B	N/A	Onco-Defender-CRC capable of Differentiating between patients at ‘‘high risk’’ from those at ‘‘low risk’’
Kwon et al., (2004) [31]	77 up-regulated genes (TSG101, U82130, hSIH2, U76248)	45 down-regulated genes (Spi-B; X66079,SEPP1; Z11793)	GEP can predict LNM
Marisa et al., (2013) [32]	N/A	N/A	GEP makes it possible to classify CRC samples based on genetic signatures and identify the targets for therapeutic attempts
Becht et al., (2016) [33]	N/A	N/A	GEP is applicable in immune and stromal classification of CRC tumours
Inoue et al., (2015) [34]	N/A	N/A	GEP could explain the heterogeneity of unresectable advanced or recurrent CRC
Vishnubalaji et al., (2015) [35]	1273 significantly up regulated genes revealed i.e. hsa-miR-135b-5p, hsa-miR-491-3p, hsa-miR-1246	1902 down regulated genes revealed in CRC i.e. hsa-miR-133b, hsa-let-7c, hsa-miR-4313	The data revealed several hundred potential miRNA-mRNA regulatory networks in CRC and suggest targeting relevant networks as potential therapeutic strategy for CRC
Yamada et al., (2018) [36]	Identified 27 up-regulated lncRNAs in CRC: CRCAL-1, CRCAL-2, CRCAL-3, CRCAL-4	Identified 22 down-regulated lncRNAs in CRC: LYNC0097, RP11-63P12.7, and TINCR	The data highlight the capability of RNA-seq to discover novel lncRNAs involved in human carcinogenesis, which may serve as alternative biomarkers and/or molecular treatment targets
Nguyen et al., (2015) [37]	All stage II and III patients were evaluated as high risk patients by CRC-113 gene signature.	CRC-113 gene signature are not correlated to demographic disparities such as age, gender and ethnicity for prognosis prediction	CRC-113 gene signature provides new possibilities for improving prognostic models and personalized therapeutic strategies
Gao et al., (2015) [38]	The CSS set–defined patients with high-risk stage II CRC gained significant survival benefits from fluorouracil adjuvant chemotherapy	The CSS set–defined patients with low-risk and intermediate-risk stage II CRC did not gain survival benefits	The prediction accuracy for low-and high-risk disease significantly outperformed other gene signatures such as Oncotype DX and ColoPrint
Li et al., (2017) [39]	Epithelial–mesenchymal transition related genes were found to be upregulated only in the CAF	N/A	Results demonstrate that unbiased single-cell RNA–seq profiling of tumour and matched normal samples enables us to characterize aberrant cell states within a tumour
